# Supplementary material
Source: ML conference proceedings conference paper supplement (https://proceedings.neurips.cc/paper_files/paper/2012/hash/09c6c3783b4a70054da74f2538ed47c6-Abstract.html)
Supplement: Supplementary file [file 09c6c3783b4a70054da74f2538ed47c6-Supplemental.zip]

## Supplementary Material for “Provable ICA with Unknown Gaussian Noise, with Implications for Gaussian Mixtures and Autoencoders”

### A Omitted proofs in Section 2

**Lemma A.1** (Denoising Lemma).  $P(u) = 2 \sum_{i=1}^n (u^T A)_i^4$

**Proof:** The crucial observation is that  $u^T y = u^T Ax + u^T \eta$  is the sum of two independent random variables,  $Ax$  and  $\eta$  and that  $P(u) = -\kappa_4(u^T Ax + u^T \eta) = -\kappa_4(u^T Ax) - \kappa_4(u^T \eta) = -\kappa_4(u^T Ax)$ . So in fact, the functional  $P(u)$  is invariant under additive Gaussian noise **independent of the variance matrix**  $\Sigma$ . This vastly simplifies our computation:

$$\begin{aligned} \mathbf{E}[(u^T Ax)^4] &= \sum_{i=1}^n (u^T A)_i^4 \mathbf{E}[x_i^4] + 6 \sum_{i < j} (u^T A)_i^2 (u^T A)_j^2 \mathbf{E}[x_i^2] \mathbf{E}[x_j^2] \\ &= \sum_{i=1}^n (u^T A)_i^4 + 6 \sum_{i < j} (u^T A)_i^2 (u^T A)_j^2 = -2 \sum_{i=1}^n (u^T A)_i^4 + 3(u^T AA^T u)^2 \end{aligned}$$

Furthermore  $\mathbf{E}[(u^T Ax)^2]^2 = (u^T AA^T u)^2$  and we conclude that

$$P(u) = -\kappa_4(u^T y) = -\mathbf{E}[(u^T Ax)^4] + 3 \mathbf{E}[(u^T Ax)^2]^2 = 2 \sum_{i=1}^n (u^T A)_i^4.$$

■

**Claim A.2.** If  $u_0$  is chosen uniformly at random then with high probability for all  $i$ ,

$$\min_{i=1}^n \|A_i\|_2^2 n^{-4} \leq D_A(u_0)_{i,i} \leq \max_{i=1}^n \|A_i\|_2^2 \frac{\log n}{n}$$

**Proof:** We can bound  $\max_{i=1}^n |A_i \cdot u|$  by  $\max_{i=1}^n \|A_i\|_2 \frac{\log n}{\sqrt{n}}$  thus the bound for  $\max_{i=1}^n (D_A(u_0))_{i,i}$  follows. Note that with high probability the minimum absolute value of  $n$  Gaussian random variables is at least  $1/n^2$ , hence  $\min_{i=1}^n (D_A(u_0))_{i,i} \geq \min_{i=1}^n \|A_i\|_2^2 n^{-4}$ . ■

**Lemma A.3.** If  $u_0$  is chosen uniformly at random and furthermore we are given  $2N = \text{poly}(n, 1/\epsilon, 1/\lambda_{\min}(A), \|A\|_2, \|\Sigma\|_2)$  samples of  $y$ , then with high probability we will have that  $(1 - \epsilon)AD_A(u_0)A^T \preceq \mathcal{H}(\hat{P}(u_0)) \preceq (1 + \epsilon)AD_A(u_0)A^T$ .

**Proof:** First we consider each entry of the matrix updates. For example, the variance of any entry in  $\mathcal{H}((u^T y)^4) = 12(u^T y)^2 y y^T$  can be bounded by  $\|y\|_2^8$ , which we can bound by  $\mathbf{E}[\|y\|_2^8] \leq O(\mathbf{E}[\|Ax\|_2^8 + \|\eta\|_2^8])$ . This can be bounded by  $O(n^4(\|A\|_2^8 + \|\Sigma\|_2^4))$ . This is also an upper bound for the variance (of any entry) of any of the other matrix updates when computing  $\mathcal{H}(\hat{P}(u_0))$ .

Applying standard concentration bounds,  $\text{poly}(n, 1/\epsilon', \|A\|_2, \|\Sigma\|_2)$  samples suffice to guarantee that all entries of  $\mathcal{H}(\hat{P}(u_0))$  are  $\epsilon'$  close to  $\mathcal{H}(P(u))$ . The smallest eigenvalue of  $\mathcal{H}(P(u)) = AD_A(u_0)A^T$  is at least  $\lambda_{\min}(A)^2 \min_{i=1}^n \|A_i\|_2^2 n^{-4}$  where here we have used Claim 2.9. If we choose  $\epsilon' = \text{poly}(1/n, \lambda_{\min}(A), \epsilon)$ , then we are also guaranteed  $(1 - \epsilon)AD_A(u_0)A^T \preceq \mathcal{H}(\hat{P}(u_0)) \preceq (1 + \epsilon)AD_A(u_0)A^T$  holds. ■

**Lemma A.4.** Suppose that  $(1 - \epsilon)AD_A(u_0)A^T \preceq \widehat{M} \preceq (1 + \epsilon)AD_A(u_0)A^T$ , and let  $\widehat{M} = BB^T$ . Then there is a rotation matrix  $R^*$  such that  $\|B^{-1}AD_A(u_0)^{1/2} - R^*\|_F \leq \sqrt{n}\epsilon$ .

**Proof:** Let  $M = AD_A(u_0)A^T$  and let  $C = AD_A(u_0)^{1/2}$ , and so  $M = CC^T$  and  $\widehat{M} = BB^T$ . The condition  $(1 - \epsilon)M \preceq \widehat{M} \preceq (1 + \epsilon)M$  is well-known to be equivalent to the condition that for all vectors  $x$ ,  $(1 - \epsilon)x^T M x \leq x^T \widehat{M} x \leq (1 + \epsilon)x^T M x$ .

Suppose for the sake of contradiction that  $S = B^{-1}C$  has a singular value outside the range  $[1 - \epsilon, 1 + \epsilon]$ . Assume (without loss of generality) that  $S$  has a singular value strictly larger than  $1 + \epsilon$

(and the complementary case can be handled analogously). Hence there is a unit vector  $y$  such that  $y^T S S^T y > 1 + \epsilon$ . But since  $B S S^T B^T = C C^T$ , if we set  $x^T = y^T B^{-1}$  then we have  $x^T \widehat{M} x = x^T B B^T x = y^T y = 1$  but  $x^T M x = x^T C C^T x = x^T B S S^T B^T x = y^T S S^T y > 1 + \epsilon$ . This is a contradiction and so we conclude that all of the singular values of  $B^{-1}C$  are in the range  $[1 - \epsilon, 1 + \epsilon]$ .

Let  $U \Sigma V^T$  be the singular value decomposition of  $B^{-1}C$ . If we set all of the diagonal entries in  $\Sigma$  to 1 we obtain a rotation matrix  $R^* = UV^T$ . And since the singular values of  $B^{-1}C$  are all in the range  $[1 - \epsilon, 1 + \epsilon]$ , we can bound the Frobenius norm of  $B^{-1}C - R^*$ :  $\|B^{-1}C - R^*\|_F \leq \sqrt{n}\epsilon$ , as desired. ■

## B Omitted proofs in Section 3

**Theorem B.1.** *Suppose we are given samples of the form  $y = Ax + \eta$  where  $x$  is uniform on  $\{+1, -1\}^n$ ,  $A$  is an  $n \times n$  matrix,  $\eta$  is an  $n$ -dimensional Gaussian random variable independent of  $x$  with unknown covariance matrix  $\Sigma$ . There is an algorithm that with high probability recovers  $\|\widehat{A} - A \Pi \text{diag}(k_i)\|_F \leq \epsilon$  where  $\Pi$  is some permutation matrix and each  $k_i \in \{+1, -1\}$  and also recovers  $\|\widehat{\Sigma} - \Sigma\|_F \leq \epsilon$ . Furthermore the running time and number of samples needed are  $\text{poly}(n, 1/\epsilon, \|A\|_2, \|\Sigma\|_2, 1/\lambda_{\min}(A))$*

**Proof:** In Step 1, by Lemma 2.11 we know once we use  $z = B^{-1}y$ , the whitened function  $P'(u)$  is inverse polynomially close to  $P^*(u)$ . Then by Lemma 5.3, the function  $\widehat{P}'(u)$  we get in Step 2 is inverse polynomially close to  $P'(u)$  and  $P^*(u)$ . Theorem 4.6 and Lemma 5.5 show that given  $\widehat{P}'(u)$  inverse polynomially close to  $P^*(u)$ , Algorithm 2: ALLOPT finds all local maxima with inverse polynomial precision. Finally by Theorem 5.6 we know  $A$  and  $W$  are recovered correctly up to additive  $\epsilon$  error in Frobenius norm. The running time and sampling complexity of the algorithm is polynomial because all parameters in these Lemmas are polynomially related. ■

## C Omitted proofs in Section 4

**Lemma C.1.** *Given  $v_1, v_2, \dots, v_k$ , each  $\gamma$ -close respectively to local maxima  $v_1^*, v_2^*, \dots, v_k^*$  (this is without loss of generality because we can permute the index of local maxima), then there is an orthonormal basis  $v_{k+1}, v_{k+2}, \dots, v_n$  for the orthogonal space of  $\text{span}\{v_1, v_2, \dots, v_k\}$  such that for any unit vector  $w \in \mathbb{R}^{n-k}$ ,  $\sum_{i=1}^{n-k} w_k v_{k+i}$  is  $3\sqrt{n}\gamma$  close to  $\sum_{i=1}^{n-k} w_k v_{k+i}^*$ .*

**Proof:** Let  $S_1$  be  $\text{span}\{v_1, v_2, \dots, v_k\}$ ,  $S_2$  be  $\text{span}\{v_1^*, v_2^*, \dots, v_k^*\}$  and  $S_1^\perp, S_2^\perp$  be their orthogonal subspaces respectively. We first prove that for any unit vector  $v \in S_1^\perp$ , there is another unit vector  $v' \in S_2^\perp$  so that  $v^T v' \geq 1 - 4n\gamma^2$ . In fact, we can take  $v'$  to be the unit vector along the projection of  $v$  in  $S_2^\perp$ . To bound the length of the projection, we instead bound the length of projection to  $S_2$ . Since we know  $v_i^T v' = 0$  for  $i \leq k$  and  $\|v_i - v_i^*\| \leq \gamma$ , it must be that  $(v_i^*)^T v' \leq 2\gamma$  when  $\gamma < 0.01$ . So the projection of  $v'$  in  $S_2$  has length at most  $2\sqrt{n}\gamma$  and hence the projection of  $v'$  in  $S_2^\perp$  has length at least  $1 - 4n\gamma^2$ .

Next, we prove that there is a pair of orthonormal basis  $\{\tilde{v}_{k+1}, \tilde{v}_{k+2}, \dots, \tilde{v}_n\}$  for  $S_1^\perp$  and  $\{\tilde{v}_{k+1}^*, \tilde{v}_{k+2}^*, \dots, \tilde{v}_n^*\}$  for  $S_2^\perp$  such that  $\sum_{i=1}^{n-k} w_k \tilde{v}_{k+i}$  is close to  $\sum_{i=1}^{n-k} w_k \tilde{v}_{k+i}^*$ . Once we have such a pair, we can simultaneously rotate the two basis so that the latter becomes  $v_{k+1}^*, \dots, v_n^*$ .

To get this set of basis we consider the projection operator to  $S_2^\perp$  for vectors in  $S_1^\perp$ . The squared length of the projection is a quadratic form over the vectors in  $S_1^\perp$ . So there is a symmetric PSD matrix  $M$  such that  $\|\text{Proj}_{S_2^\perp}(v)\|_2^2 = v^T M v$  for  $v \in S_1^\perp$ . Let  $\{\tilde{v}_{k+1}, \tilde{v}_{k+2}, \dots, \tilde{v}_n\}$  be the eigenvectors of this matrix  $M$ . As we showed the eigenvalues must be at least  $1 - 8n\gamma^2$ . The basis for  $S_2^\perp$  will just be unit vectors along directions of projections of  $\tilde{v}_i$  to  $S_2^\perp$ . They must also be orthogonal because the projection operator is linear and

$$\left\| \text{Proj}_{S_2^\perp} \left( \sum_{i=1}^{n-k} w_i \tilde{v}_{k+i} \right) \right\|_2^2 = \left\| \sum_{i=1}^{n-k} w_i \text{Proj}_{S_2^\perp}(\tilde{v}_{k+i}) \right\|_2^2 = \sum_{i=1}^{n-k} \lambda_i w_i^2$$

The second equality cannot hold if these vectors are not orthogonal. And for any  $w$ ,

$$\left( \sum_{i=1}^{n-k} w_k \tilde{v}_{k+i} \right)^T \left( \sum_{i=1}^{n-k} w_k \tilde{v}_{k+i}^* \right) = \sum_{i=1}^{n-k} w_k^2 (\tilde{v}_{k+i})^T \tilde{v}_{k+i}^* \geq 1 - 8n\gamma^2$$

So we conclude that the distance between these two vectors is at most  $3\sqrt{n}\gamma$ . ■

**Lemma C.2.** *Let  $g^*$  be the projection of  $f^*$  into the space spanned by the rest of local maxima, then  $|g^*(w) - g(w)| \leq \delta/8 + \delta'/20 \leq \delta'/8$ .*

**Proof:** The proof is straight forward because  $|g^*(w) - g(w)| \leq |f^*(u) - f(u)| + |f^*(u) - f^*(u')|$  for some  $\|u - u'\|_2 \leq 3\sqrt{n}\gamma$ , we know the first one is at most  $\delta/8$  and the second one is at most  $\delta'/20$  by Lipschitz Condition. ■

**Theorem C.3.** *Suppose function  $f^*(u) : \mathbb{R}^n \rightarrow \mathbb{R}$  satisfies the following properties*

1. *Orthogonal Local Maxima: The function has  $n$  local maxima  $v_i^*$  and they are orthogonal to each other.*
2. *Locally Improvable:  $f^*$  is  $(\gamma, \beta, \delta)$  Locally Improvable.*
3. *Improvable Projection: The projection of the function to any subspace spanned by a subset of local maxima is  $(\gamma', \beta', \delta')$  Locally Improvable. The step size  $\delta' \geq 10\delta$ .*
4. *Lipschitz: If two points  $\|u - u'\|_2 \leq 3\sqrt{n}\gamma$ , then the function value  $|f^*(u) - f^*(u')| \leq \delta'/20$ .*
5. *Attraction Radius: Let  $\text{Rad} \geq 3\sqrt{n}\gamma + \gamma'$ , for any local maximum  $v_i^*$ , let  $T$  be  $\min f^*(u)$  for  $\|u - v_i^*\|_2 \leq \text{Rad}$ , then there exist a set  $U$  containing  $\|u - v_i^*\|_2 \leq 3\sqrt{n}\gamma + \gamma'$  and does not contain any other local optima, such that for every  $u$  that is not in  $U$  but is  $\beta$  close to  $U$ ,  $f^*(u) < T$ .*

*If we are given function  $f$  such that  $|f(u) - f^*(u)| \leq \delta/8$  and  $f$  is both  $(\beta, \delta)$  and  $(\beta', \delta')$  Locally Approximable, then Algorithm 2 can find all local optima of  $f^*$  within distance  $\gamma$ .*

**Proof:** By Theorem 4.4 the first column is indeed  $\gamma$  close to a local maximum. We then prove by induction that if  $v_1, v_2, \dots, v_k$  are  $\gamma$  close to different local maxima, then  $v_{k+1}$  must be close to a new local maximum.

By Lemma 4.8 we know  $g_{k+1}$  is  $(\gamma', \beta', \delta')$  Locally Improvable, and because it is a projection of  $f$  its derivatives are also bounded so it is  $(\beta', \delta')$  Locally Approximable. By Theorem 4.4  $u'$  must be  $\gamma'$  close to local maximum for the projected function. Then since the projected space is close to the space spanned by the rest of local maxima,  $u'$  is in fact  $\gamma' + 3\sqrt{n}\gamma$  close to  $v_{k+1}^*$  (here again we are reindexing the local maxima wlog.).

Now we use the Attraction Radius property, since  $u$  is currently in  $U$ ,  $f^*(u) \geq T$ , and each step we go to a point  $u'$  such that  $\|u' - u\| \leq \beta$  and  $f^*(u') > f^*(u) \geq T$ . The local search in Algorithm 1 can never go outside  $U$ , therefore it must find the local maximum  $v_{k+1}^*$ . ■

## D Omitted proofs in Section 5

**Theorem D.1 ([5]).** *When  $\beta < d_{\min}/10d_{\max}n^2$ , the function  $P^*(u)$  is  $(3\sqrt{n}\beta, \beta, P^*(u)\beta^2/100)$  Locally Improvable and  $(\beta, d_{\min}\beta^2/100n)$  Locally Approximable. Moreover, the local maxima of the function is exactly  $\{\pm R_i^*\}$ .*

**Proof:** The proof appears in [5]. Here for completeness we show the proof using our notations.

First we establish that  $P^*(u)$  is Locally Improvable. Observe that this desiderata is invariant under rotation, so we need only prove the theorem for  $P^*(v) = \sum_{i=1}^n d_i v_i^4$ . The gradient of the function is  $\nabla P^*(v) = 4(d_1 v_1^3, d_2 v_2^3, \dots, d_n v_n^3)$ . The inner product of  $\nabla P^*(v)$  and  $v$  is exactly  $4 \sum_{i=1}^n d_i v_i^4 = 4P^*(v)$ . Therefore the projected gradient  $\phi = \text{Proj}_{\perp v} \nabla P^*(v)$  has coordinate  $\phi_i = 4v_i(d_i v_i^2 - P^*(v))$ . Furthermore, the Hessian  $H = \mathcal{H}(P^*(v))$  is a diagonal matrix whose  $(i, i)^{th}$  entry is  $12d_i v_i^2$ .

Consider the case in which  $\|\phi\| \geq P^*(v)\beta/4$ . We can obtain an improvement to  $P^*(v)\beta^2/100$  because we can take  $\xi$  in the direction of  $\phi$  and with  $\|\xi\|_2 = \beta/20$ . The contribution of the Hessian term is nonnegative and the third term  $-2P^*(u)\|\xi\|_2^2$  is small in comparison.

Hence, we can assume  $\|\phi\| \leq P^*(v)\beta/4$ . Now let us write out the expression of  $\|\phi\|^2$

$$\sum_{i=1}^n v_i^2 (d_i v_i^2 - P^*(v))^2 \leq \beta^2 (P^*(v))^2 / 16.$$

In particular every term  $v_i^2 (d_i v_i^2 - P^*(v))^2$  must be at most  $\beta^2 (P^*(v))^2 / 16$ . Thus for any  $i$ , either  $v_i^2 \leq \beta^2$  or  $(d_i v_i^2 - P^*(v))^2 \leq (P^*(v))^2 / 16$ .

If there are at least 2 coordinates  $k$  and  $l$  such that  $(d_i v_i^2 - P^*(v))^2 \leq (P^*(v))^2 / 16$ , then we know for these two coordinates  $v_i^2 \in [0.75P^*(v)/d_i, 1.25P^*(v)/d_i]$ . We choose the vector  $\xi$  so that  $\xi_k = \tau v_l$  and  $\xi_l = -\tau v_k$ . Wlog assume  $\xi \cdot \phi \geq 0$  otherwise we use  $-\xi$ . Take  $\tau$  so that  $\tau^2(v_l^2 + v_k^2) = \beta^2$ . Clearly  $\|\xi\| = \beta$  and  $\xi \cdot v = 0$  so  $\xi$  is a valid solution. Also  $\tau^2$  is lower bounded by  $\beta^2/(v_l^2 + v_k^2) \geq \frac{4}{5} \frac{\beta^2}{P^*(u)(1/d_l + 1/d_k)}$ .

Consider the function we are optimizing:

$$\begin{aligned} \phi \cdot \xi + 1/2 \xi^T \mathcal{H} \xi - 2P^*(u)\|\xi\|_2 &\geq 1/2 \xi^T H \xi - 2P^*(u)\beta^2 = 6\tau^2 v_k^2 v_l^2 (d_k + d_l) - 2P^*(u)\beta^2 \\ &\geq \frac{27}{8} \tau^2 P^*(u)^2 \frac{d_k + d_l}{d_k d_l} - 2P^*(u)\beta^2 \geq \frac{7}{10} P^*(u)\beta^2. \end{aligned}$$

In the remaining case, all of the coordinates except for at most one satisfy  $v_i^2 \leq \beta^2$ . Since we assumed  $\beta^2 < \frac{1}{n}$ , there must be one of the coordinate  $v_k$  that is large, and it is at least  $1 - n\beta^2$ . Thus the distance of this vector to the local maxima  $e_k$  is at most  $3\sqrt{n}\beta$ . ■

**Claim D.2.**  $Z = O(d_{\min}^2 \lambda_{\min}(A)^8 \|\Sigma\|_2^4 + d_{\min}^2)$ .

**Proof:** We will start by bounding  $\mathbf{E}[(z_i z_j z_k z_l)^2] \leq \mathbf{E}[(z_i^8 + z_j^8 + z_k^8 + z_l^8)]$ . Furthermore  $\mathbf{E}[z_i^8] \leq O(\mathbf{E}[(B^{-1}Ax)_i^8 + (B^{-1}\eta)_i^8])$ . Next we bound  $\mathbf{E}[(B^{-1}\eta)_i^8]$ , which is just the eighth moment of a Gaussian with variance at most  $\|B^{-1}\Sigma B^{-T}\|_2 \leq \|B^{-1}\|_2^2 \|\Sigma\|_2 \leq d_{\min}^{1/2} \lambda_{\min}(A)^{-2} \|\Sigma\|_2$ . Hence we can bound this term by  $O(\|B^{-1}\Sigma B^{-T}\|_2^4) = O(d_{\min}^2 \lambda_{\min}(A)^8 \|\Sigma\|_2^4)$ . Finally the remaining term  $\mathbf{E}[(B^{-1}Ax)_i^8]$  can be bounded by  $O(d_{\min}^2)$  because the variance of this random variable is only larger if we instead replace  $x$  by an  $n$ -dimensional standard Gaussian. ■

**Lemma D.3.** Given  $2N$  samples  $y_1, y_2, \dots, y_N, y'_1, y'_2, \dots, y'_N$ , suppose columns of  $R' = B^{-1}AD_A(u_0)^{1/2}$  are  $\epsilon$  close to the corresponding columns of  $R^*$ , with high probability the function  $\hat{P}'(u)$  is  $O(d_{\max} n^{1/2} \epsilon + n^2 (N/Z \log n)^{-1/2})$  close to the true function  $P^*(u)$ .

**Proof:**  $\hat{P}'(u)$  is the empirical mean of  $F(u, y, y') = -(u^T B^{-1}y)^4 + 3(u^T B^{-1}y)^2 (u^T B^{-1}y')^2$ . In Section 2 we proved that  $P'(u) = \mathbf{E}_{y, y'} F(u, y, y') = \sum_{i=1}^n 2D_{i,i}^{-1/2} (u^T R_i)^4 = \sum_{i=1}^n \lambda_i (u^T R_i)^4$ . First, we demonstrate that  $P'(u)$  is close to  $P^*(u)$ , and then using concentration bounds we show that  $\hat{P}'(u)$  is close to  $P'(u)$  (with high probability) over all  $u$ .

The first part is a simple application of Cauchy-Schwartz:

$$\begin{aligned} |P'(u) - P^*(u)| &= \sum_{i=1}^n d_i [(u^T R'_i)^4 - (u^T R_i^*)^4] \cdot [(u^T R'_i + u^T R_i^*)((u^T R'_i)^2 + (u^T R_i^*)^2)] \\ &\leq d_{\max} \sqrt{\sum_{i=1}^n (u^T (R'_i - R_i^*))^2} \cdot (3 \|u^T R' + u^T R^*\|_2) \leq 6d_{\max} n^{1/2} \epsilon. \end{aligned}$$

The first inequality uses the fact that  $((u^T R'_i)^2 + (u^T R_i^*)^2) \leq 3$ , the second inequality uses the fact that when  $\epsilon$  is small enough,  $\|u^T R'\|_2 \leq 2$ .

Next we prove that the empirical mean  $\hat{P}'(u)$  is close to  $P'(u)$ . The key point here is we need to prove this for all points  $u$  since a priori we have no control over which directions local search

will choose to explore. We accomplish this by considering  $\hat{P}'(u)$  as a degree-4 polynomial over  $u$  and prove that the coefficient of each monomial in  $\hat{P}'(u)$  is close to the corresponding coefficient in  $P'(u)$ . This is easy: the expectation of each coefficient of  $F(u, y, y')$  is equal to the correct coefficient, and the variance is bounded by  $O(Z)$ . The coefficients are also sub-Gaussian so by Bernstein's inequality the probability that any coefficient of  $\hat{P}'(u)$  deviates by more than  $\epsilon'$  (from its expectation) is at most  $e^{-\Omega(\epsilon'^2 N/Z)}$ . Hence when  $N \geq O(Z \log n / \epsilon'^2)$  with high probability all the coefficients of  $\hat{P}'(u)$  and  $P'(u)$  are  $\epsilon'$  close. So for any  $u$ :

$$|P'(u) - \hat{P}'(u)| \leq \epsilon' \left( \sum_{i=1}^n |u_i| \right)^4 \leq \epsilon' n^2.$$

Therefore  $\hat{P}'(u)$  and  $P^*(u)$  are  $O(d_{\max} n^{1/2} \epsilon + n^2 (N/Z \log n)^{-1/2})$  close. ■

This proof can also be used to show that the derivatives of the function  $\hat{P}'(u)$  is concentrated to the derivatives of the true function  $P^*(u)$  because the derivatives are only related to coefficients, therefore  $\hat{P}'(u)$  is also  $(\beta, d_{\min} \beta^2 / 100n)$  Locally Approximable.

**Lemma D.4.** For any  $\|u - u'\|_2 \leq r$ ,  $|P^*(u) - P^*(u')| \leq 5d_{\max} n^{1/2} r$ . All local maxima of  $P^*$  has attraction radius  $\text{Rad} \geq d_{\min} / 100d_{\max}$ .

**Proof:** The Lipschitz condition follows from the same Cauchy-Schwartz as appeared above. When two points  $u$  and  $u'$  are of distance  $r$ ,  $|P^*(u) - P^*(u')| \leq 5d_{\max} n^{1/2} r$ . Finally for the Attraction Radius, we know when  $3\sqrt{n}\gamma + \gamma' \leq d_{\min} / 100d_{\max}$ , we can just take the set  $U$  to be  $u^T R_i^* \geq 1 - d_{\min} / 50d_{\max}$ . For all  $u$  such that  $u^T R_i^* \in [1 - d_{\min} / 25d_{\max}, 1 - d_{\min} / 50d_{\max}]$  (which contains the  $\beta$  neighborhood of  $U$ ), we know the value of  $P^*(u) \leq T$ . ■

**Theorem D.5.** Given a matrix  $\hat{R}$  such that there is permutation matrix  $\Pi$  and  $k_i \in \{\pm 1\}$  with  $\|\hat{R}_i - k_i(R^* \Pi)_i\|_2 \leq \gamma$  for all  $i$ , Algorithm 3 returns matrix  $\hat{A}$  such that  $\|\hat{A} - A \Pi \text{Diag}(k_i)\|_F \leq O(\gamma \|A\|_2^2 n^{3/2} / \lambda_{\min}(A))$ . If  $\gamma \leq O(\epsilon / \|A\|_2^2 n^{3/2} \lambda_{\min}(A)) \times \min\{1 / \|A\|_2, 1\}$ , we also have  $\|\hat{\Sigma} - \Sigma\|_F \leq \epsilon$ .

**Proof:** By Lemma 2.11 we know the columns of  $R'$  is close the the columns of  $R$  (the parameters will be set so that the error is much smaller than  $\gamma$ ), thus  $\|\hat{R}_i - k_i(R' \Pi)_i\|_2 \leq \gamma$ . Applying Lemma 5.3 we obtain:  $|\hat{P}'(\hat{R}_i) - P^*(\hat{R}_i)| \ll \gamma$ . Furthermore, when  $\|\hat{R}_i - k_i R_{\Pi^{-1}(i)}^*\|_2 \leq \gamma$  we know that  $P^*(\hat{R}_i) / d_{\Pi^{-1}(i)} \in [1 - 3\gamma, 1 + 3\gamma]$  (here we are abusing notation and use the permutation matrix as a permutation). Hence  $\hat{D}_A(u)_{i,i} / (D_A(u))_{\Pi^{-1}(i), \Pi^{-1}(i)} \in [1 - 3\gamma, 1 + 3\gamma]$ . We have:

$$\hat{A}_i = B \hat{R}_i \hat{D}_A(u)_{i,i}^{-1/2} \text{ and } (A \Pi \text{Diag}(k_i))_i = B R'_{\Pi^{-1}(i)} (D_A(u))_{\Pi^{-1}(i), \Pi^{-1}(i)}^{-1/2}$$

and their difference is at most  $O(\gamma \|B\|_2 (D_A(u))_{\Pi^{-1}(i), \Pi^{-1}(i)}^{-1/2})$ . Hence we can bound the total error by  $O(\gamma \|B\|_2 \|D_A(u)^{-1/2}\|_F)$ . We also know  $\|B\|_2 \leq \|A\|_2 \|D_A(u)^{1/2}\|_2$  because  $BB^T \approx AD_A(u)A^T$ , so this can be bounded by  $O(\gamma \|A\|_2 \|D_A(u)\|_2^{1/2} \|D_A(u)^{-1/2}\|_F)$ . Applying Claim 2.9, we conclude that (with high probability) the ratio of the largest to smallest diagonal entry of  $D_A(u)$  is at most  $n^2 \|A\|_2^2 / \lambda_{\min}(A)^2$ . So we can bound the error by  $O(\gamma \|A\|_2^2 n^{3/2} / \lambda_{\min}(A))$ .

Consider the error for  $\Sigma$ : Using concentration bounds similar but much simpler than those used in Lemma 5.3, we obtain that  $\|\hat{C} - C\|_F \leq 1/2\epsilon$ , so  $\|\hat{\Sigma} - \Sigma\|_F \leq \|\hat{C} - C\|_F - \|\hat{A} \hat{A}^T - A A^T\|_F \leq \epsilon/2 + 2\|A\|_2 \|A \Pi \text{Diag}(k_i) - \hat{A}\|_F + \|A \Pi \text{Diag}(k_i) - \hat{A}\|_F^2 \leq \epsilon$ . ■
